# Supplementary material for: Copolyesters of ε-caprolactone and l-lactide catalyzed by a tetrabutylammonium phthalimide-N-oxyl organocatalyst
Source: Royal Society of Chemistry journal article supplement (doi:10.1039/d1ra02417e), 2021-01-01
Supplement: d1ra02417e1.pdf [file d1ra02417e1.pdf]

## Supporting Information

### **Copolyesters of $\epsilon$ -caprolactone and L-lactide catalyzed by tetrabutylammonium phthalimide-N-oxyl organocatalyst**

**Zhiheng Feng<sup>a</sup>, Li Wu<sup>a</sup>, Huan Dong<sup>a</sup>, Boping Liu<sup>b</sup> and Ruihua Cheng<sup>\*a</sup>**

<sup>a</sup>School of Chemical Engineering, East China University of Science and Technology,  
Meilong Road 130, Shanghai, 200237, China

<sup>b</sup>College of Materials and Energy, South China Agricultural University, Guangzhou,  
510642, China

\*Correspondence to: Ruihua Cheng, College of Chemical Engineering, East China  
University of Science and Technology, Meilong Road 130, Shanghai, 200237, China  
(Email: rhcheng@ecust.edu.cn)

## **Materials and Methods**

FT-IR spectra was recorded on a BRUKER VERTEX-70 FT-IR spectrophotometer, scanning in the spectral range of 400-4000  $\text{cm}^{-1}$  with the scanning resolution of 4.0  $\text{cm}^{-1}$ . Thermogravimetric analysis (TGA) was performed using a TA Q500 TGA instrument under a nitrogen atmosphere. The sample was heated from 30 to 600  $^{\circ}\text{C}$  at a heating rate of 10  $^{\circ}\text{C}/\text{min}$ .

### **Copolymerization of L-LA and $\epsilon$ -CL for 2 min**

The copolymerization was conducted in a glovebox. Magnetic heating plate was preheated to the desired temperature. Equivalent amount of L-lactide and  $\epsilon$ -caprolactone, **TBAPINO**,  $^t\text{BuONa}$  and a magnetic stirrer were added to 10 mL Schlenk tube. After reaction for 2 min, the benzoic acid was used to quench the reaction. Then the dichloromethane was used to dissolve the crude product, and the copolymer was precipitated by dropping into excess fast-stirring ethanol. The solid residue was centrifuged and dried at vacuum at 50  $^{\circ}\text{C}$  for 12 h and a white solid copolymer was obtained.

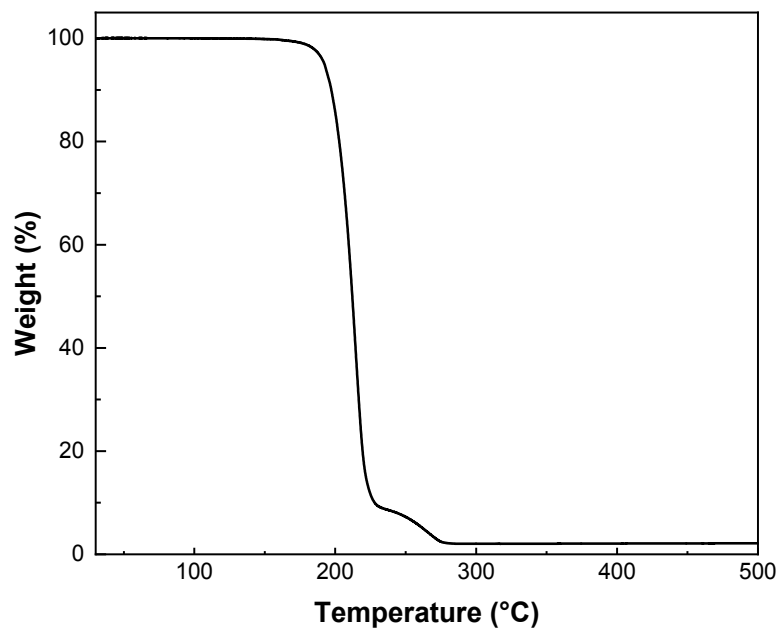

Fig. S1 TGA curve of TBAPINO

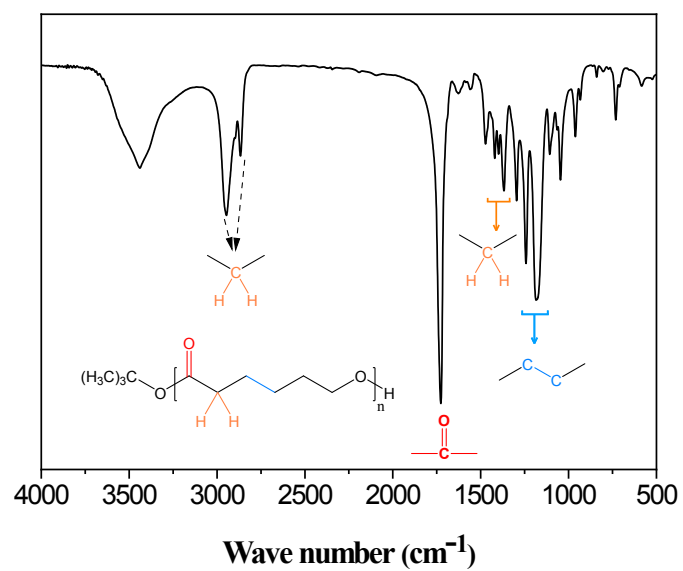

Fig. S2 IR spectrum of PCL (Table 4, entry 10)

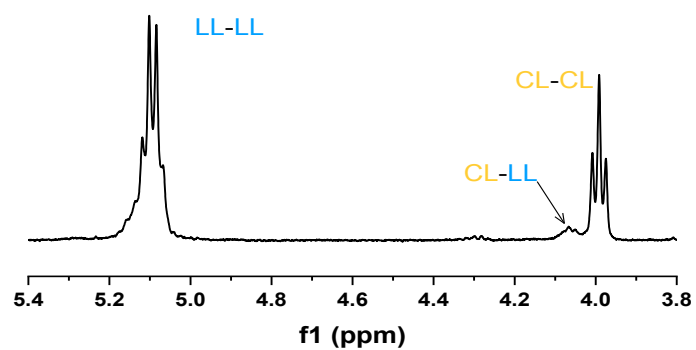

**Fig. S3** <sup>1</sup>H NMR of PCLA (Polymerization condition: 120 °C, [CL]:[TBAPINO]:[<sup>t</sup>BuONa]=200:10:1, [CL]:[LA]=1:1, LA and CL were charged together, quenched after reaction for 2 min); LL and CL referred to the lactidyl and caproyl units respectively
